# Supplementary material for: Overexpression of DGAT2 Stimulates Lipid Droplet Formation and Triacylglycerol Accumulation in Bovine Satellite Cells
Source: MDPI journal article supplement (doi:10.3390/ani12141847), 2022-07-20
Supplement: s1 [file s1]

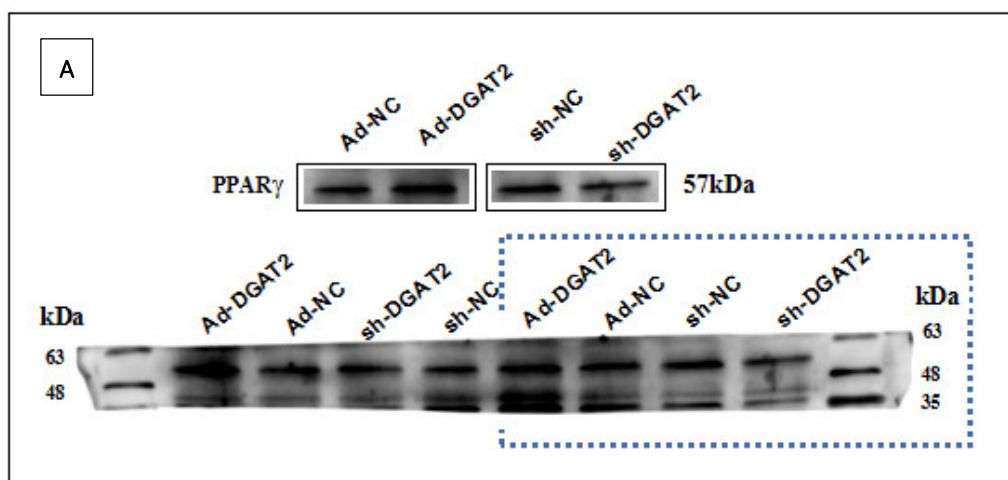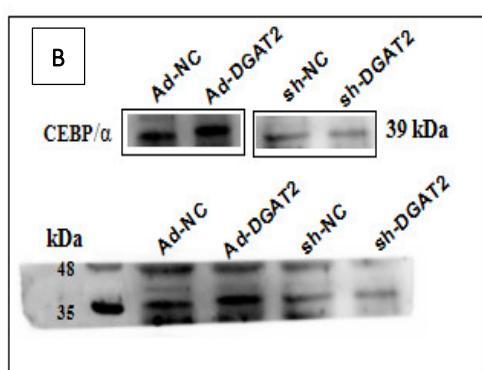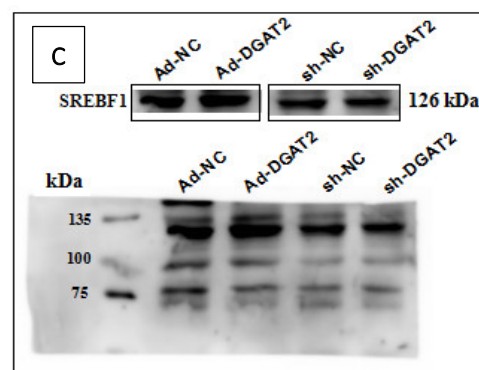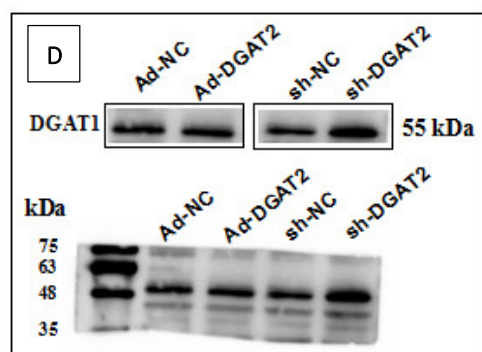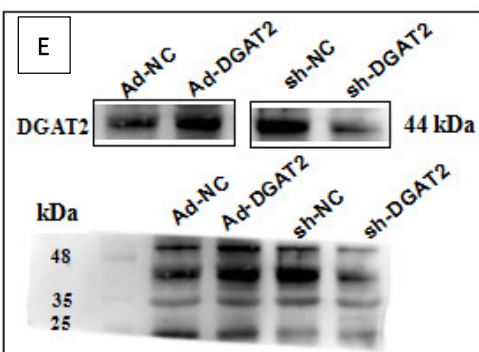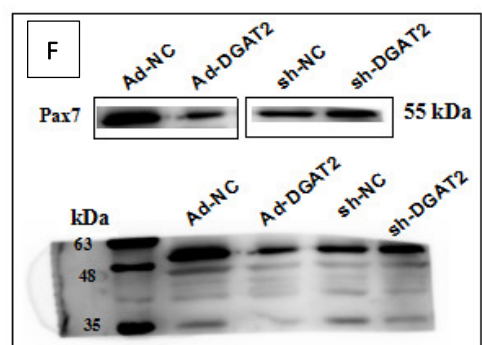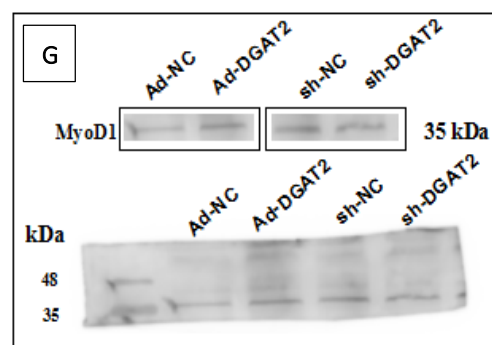

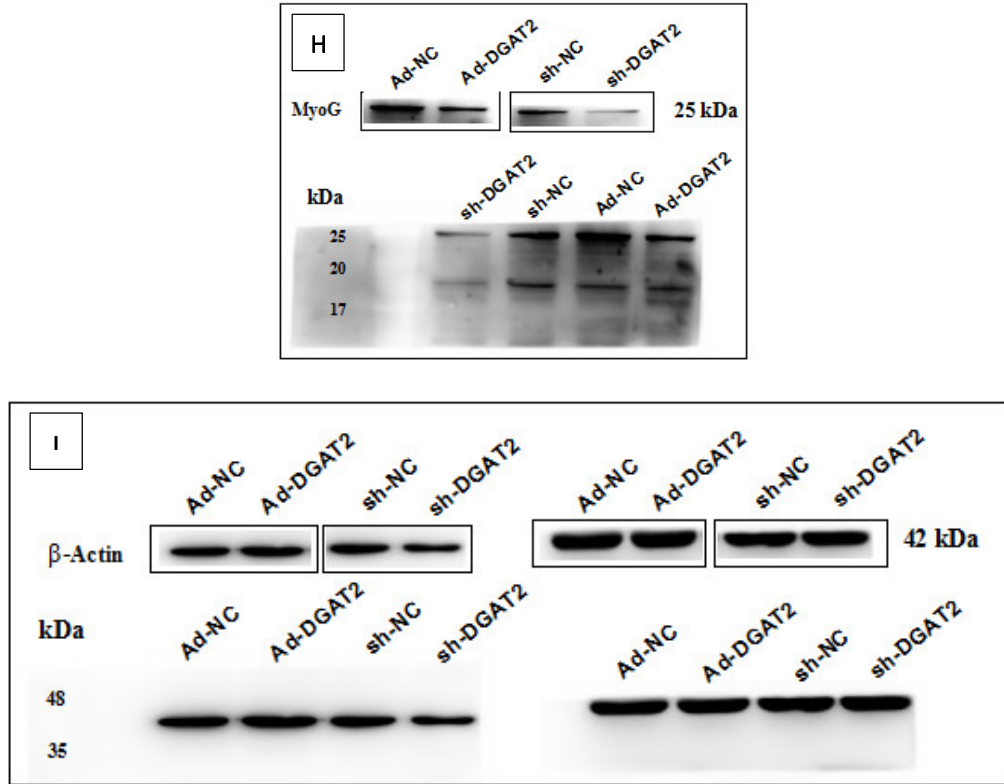

**Figure S1.** The original figure of the upper blot membrane of Figure 5E and 6E. The original western blot of PPAR $\gamma$  (A), C/EBP $\alpha$  (B), SREBF1 (C), DGAT1 (D), DGAT2 (E), Pax7 (F), MyoD1 (G), MyoG (H) and  $\beta$ -actin (I) protein in BSCs transfected with Ad-DGAT2/Ad-NC and sh-DGAT2/sh-NC.

**Table S1.** Information of clean data.

| Sample     | Trimmed_Read_Number | Trimmed_Bases | Useful_Read% | Useful_Bases% |
|------------|---------------------|---------------|--------------|---------------|
| Ad-DGAT2-1 | 39262616            | 5.89E+09      | 93.31        | 93.31         |
| Ad-DGAT2-2 | 35167218            | 5.28E+09      | 93.21        | 93.21         |
| Ad-DGAT2-3 | 38882100            | 5.83E+09      | 93.13        | 93.13         |
| Ad-NC-1    | 46321320            | 6.95E+09      | 92.71        | 92.71         |
| Ad-NC-2    | 42544930            | 6.38E+09      | 92.75        | 92.75         |
| Ad-NC-3    | 40137942            | 6.02E+09      | 92.9         | 92.9          |
| sh-NC-1    | 39417084            | 5.91E+09      | 93.48        | 93.48         |
| sh-NC-2    | 36545664            | 5.48E+09      | 92.79        | 92.79         |
| sh-NC-3    | 40611026            | 6.09E+09      | 92.55        | 92.55         |
| sh-DGAT2-1 | 35169252            | 5.28E+09      | 92.93        | 92.93         |
| sh-DGAT2-2 | 35238180            | 5.29E+09      | 92.85        | 92.85         |
| sh-DGAT2-3 | 38945646            | 5.84E+09      | 91.95        | 91.95         |

**Table S2.** Summary of sequencing data and reference genome comparison.

| Sample      | Clean Reads | Total Mapped         | Multiple Mapped    | Uniquely Mapped      | Map Events | Mapped to Gene       | Mapped to InterGene | Mapped to Exon       |
|-------------|-------------|----------------------|--------------------|----------------------|------------|----------------------|---------------------|----------------------|
| Ad-DGA T2-1 | 39262616    | 37622923<br>(95.82%) | 873691<br>(2.32%)  | 36749232<br>(97.68%) | 36749232   | 35293712<br>(96.04%) | 1455520 (3.96%)     | 31542318<br>(89.37%) |
| Ad-DGA T2-2 | 35167218    | 33651647<br>(95.69%) | 786025<br>(2.34%)  | 32865622<br>(97.66%) | 32865622   | 31549754<br>(96.00%) | 1315868 (4.00%)     | 28197356<br>(89.37%) |
| Ad-DGA T2-3 | 38882100    | 37271804<br>(95.86%) | 871345<br>(2.34%)  | 36400459<br>(97.66%) | 36400459   | 34913834<br>(95.92%) | 1486625 (4.08%)     | 31094804<br>(89.06%) |
| Ad-NC-1     | 46321320    | 44601943<br>(96.29%) | 1063563<br>(2.38%) | 43538380<br>(97.62%) | 43538380   | 41855359<br>(96.13%) | 1683021 (3.87%)     | 37777213<br>(90.26%) |
| Ad-NC-2     | 42544930    | 40999061<br>(96.37%) | 998055<br>(2.43%)  | 40001006<br>(97.57%) | 40001006   | 38455274<br>(96.14%) | 1545732 (3.86%)     | 34845919<br>(90.61%) |
| Ad-NC-3     | 40137942    | 38686409<br>(96.38%) | 916427<br>(2.37%)  | 37769982<br>(97.63%) | 37769982   | 36307118<br>(96.13%) | 1462864 (3.87%)     | 32804176<br>(90.35%) |
| sh-NC-1     | 39417084    | 37878441<br>(96.10%) | 910491<br>(2.40%)  | 36967950<br>(97.60%) | 36967950   | 35564990<br>(96.20%) | 1402960 (3.80%)     | 32005234<br>(89.99%) |
| sh-NC-2     | 36545664    | 35113371<br>(96.08%) | 821878<br>(2.34%)  | 34291493<br>(97.66%) | 34291493   | 32980521<br>(96.18%) | 1310972 (3.82%)     | 29687377<br>(90.01%) |
| sh-NC-3     | 40611026    | 39064222<br>(96.19%) | 941925<br>(2.41%)  | 38122297<br>(97.59%) | 38122297   | 36658899<br>(96.16%) | 1463398 (3.84%)     | 33056041<br>(90.17%) |
| sh-DGAT 2-1 | 35169252    | 33751703<br>(95.97%) | 819747<br>(2.43%)  | 32931956<br>(97.57%) | 32931956   | 31668648<br>(96.16%) | 1263308 (3.84%)     | 28467607<br>(89.89%) |
| sh-DGAT 2-2 | 35238180    | 33889997<br>(96.17%) | 823194<br>(2.43%)  | 33066803<br>(97.57%) | 33066803   | 31823353<br>(96.24%) | 1243450 (3.76%)     | 28581042<br>(89.81%) |
| sh-DGAT 2-3 | 38945646    | 37444094<br>(96.14%) | 900685<br>(2.41%)  | 36543409<br>(97.59%) | 36543409   | 35145388<br>(96.17%) | 1398021 (3.83%)     | 31473172<br>(89.55%) |
